# Supplementary material for: Forensic study on rural road pavement failures along Parit Sumarto
Source: MDPI journal article supplement (doi:10.3390/ani12060685), 2006-12-01
Supplement: s1 [file s1]

Table S1: Nutritional Information of Foods

| Food            | Serving Size   | Calories | Calories From Fat | Total Fat |    | Sodium |    | Potassium |    |
|-----------------|----------------|----------|-------------------|-----------|----|--------|----|-----------|----|
|                 |                |          |                   | g         | dv | mg     | dv | mg        | dv |
| Apricots        | 100g           | 48       |                   | 0.39      |    | 1      |    | 259       |    |
| Apples          | (242 g/8 oz)   | 130      | 0                 | 0         | 0  | 0      | 0  | 260       | 7  |
| Asparagus       | (93 g/3.3 oz)  | 20       | 0                 | 0         | 0  | 0      | 0  | 230       | 7  |
| Bananas         | (126 g/4.5 oz) | 110      | 0                 | 0         | 0  | 0      | 0  | 450       | 13 |
| Beets           | 100g           | 43       |                   | 0.17      |    | 78     |    | 325       |    |
| Broccoli        | (148 g/5.3 oz) | 45       | 0                 | 0.5       | 1  | 80     | 3  | 460       | 13 |
| Brussel Sprouts | 100g           | 43       |                   | 0.3       |    | 25     |    | 389       |    |
| Cantaloupe      | (134 g/4.8 oz) | 50       | 0                 | 0         | 0  | 20     | 1  | 240       | 7  |
| Carrots         | (78 g/2.8 oz)  | 30       | 0                 | 0         | 0  | 60     | 3  | 250       | 7  |
| Cauliflower     | (99 g/3.5 oz)  | 25       | 0                 | 0         | 0  | 30     | 1  | 270       | 8  |
| Celery          | (110 g/3.9 oz) | 15       | 0                 | 0         | 0  | 115    | 5  | 260       | 7  |
| Cucumbers       | (99 g/3.5 oz)  | 10       | 0                 | 0         | 0  | 0      | 0  | 140       | 4  |
| Tomatoes        | (148 g/5.3 oz) | 25       | 0                 | 0         | 0  | 20     | 1  | 340       | 10 |
| Eggplant        | 100g           | 25       |                   | 0.18      |    | 2      |    | 229       |    |
| Green Onions    | (25 g/0.9 oz)  | 10       | 0                 | 0         | 0  | 10     | 0  | 70        | 2  |
| Grapefruit      | (154 g/5.5 oz) | 60       | 0                 | 0         | 0  | 0      | 0  | 160       | 5  |
| Honeydew Melon  | (134 g/4.8 oz) | 50       | 0                 | 0         | 0  | 30     | 1  | 210       | 6  |
| Green Beans     | (83 g/3.0 oz)  | 20       | 0                 | 0         | 0  | 0      | 0  | 200       | 6  |
| Kiwi            | (148 g/5.3 oz) | 90       | 10                | 1         | 2  | 0      | 0  | 450       | 13 |
| Mango           | 100g           | 60       |                   | 0.38      |    | 1      |    | 168       |    |
| Orange          | (154 g/5.5 oz) | 80       | 0                 | 0         | 0  | 0      | 0  | 250       | 7  |
| Papaya          | 100g           | 43       |                   | 0.26      |    | 8      |    | 182       |    |
| Parsnips        | 100g           | 75       |                   | 0.3       |    | 10     |    | 375       |    |
| Peach           | (147 g/5.3 oz) | 60       | 0                 | 0.5       | 1  | 0      | 0  | 230       | 7  |
| Pear            | (166 g/5.9 oz) | 100      | 0                 | 0         | 0  | 0      | 0  | 190       | 5  |
| Pineapple       | (112 g/4 oz)   | 50       | 0                 | 0         | 0  | 10     | 0  | 120       | 3  |
| Plum            | (151 g/5.4 oz) | 70       | 0                 | 0         | 0  | 0      | 0  | 230       | 7  |
| Potato          | (148 g/5.3 oz) | 110      | 0                 | 0         | 0  | 0      | 0  | 620       | 18 |
| Radish          | (85 g/3.0 oz)  | 10       | 0                 | 0         | 0  | 55     | 2  | 190       | 5  |
| Red Onions      | (148 g/5.3 oz) | 45       | 0                 | 0         | 0  | 5      | 0  | 190       | 5  |
| Romaine Lettuce | (85 g/3.0 oz)  | 15       | 0                 | 0         | 0  | 35     | 1  | 170       | 5  |

|               |                 |     |   |      |   |    |   |     |    |
|---------------|-----------------|-----|---|------|---|----|---|-----|----|
| Rutabaga      | 100g            | 37  |   | 0.16 |   | 12 |   | 305 |    |
| Strawberries  | (147 g/5.3 oz)  | 50  | 0 | 0    | 0 | 0  | 0 | 170 | 5  |
| Sweet Peppers | (148 g/5.3 oz)  | 25  | 0 | 0    | 0 | 40 | 2 | 220 | 6  |
| Turnips       | 100g            | 28  |   | 0.1  |   | 67 |   | 191 |    |
| Watermelon    | (280 g/10.0 oz) | 80  | 0 | 0    | 0 | 0  | 0 | 270 | 8  |
| Grapes        | (126 g/4.5 oz)  | 90  | 0 | 0    | 0 | 15 | 1 | 240 | 7  |
| Yam           | (130 g/4.6 oz)  | 100 | 0 | 0    | 0 | 70 | 3 | 440 | 13 |

Information gathered from [fda.gov](https://fda.gov) and <https://fdc.nal.usda.gov/fdc-app.html#/food-search> (shaded)

| Total Carbs<br>g | dv | Dietary Fiber<br>g | dv | Sugars<br>g | Protein<br>g | Vit A<br>dv | Vit C<br>dv | Calcium<br>dv | Iron<br>dv |
|------------------|----|--------------------|----|-------------|--------------|-------------|-------------|---------------|------------|
| 11.1             |    | 2                  |    | 9.24        | 1.4          |             |             |               |            |
| 34               | 11 | 5                  |    | 20          | 25           | 1           | 2           | 8             | 2          |
| 4                | 1  | 2                  |    | 8           | 2            | 2           | 10          | 15            | 2          |
| 30               | 10 | 3                  |    | 12          | 19           | 1           | 2           | 15            | 0          |
| 9.56             |    | 2.8                |    | 6.76        | 1.61         |             |             |               |            |
| 8                | 3  | 3                  |    | 12          | 2            | 4           | 6           | 220           | 6          |
| 8.95             |    | 3.8                |    | 2.2         | 3.38         |             |             |               |            |
| 12               | 4  | 1                  |    | 4           | 11           | 1           | 120         | 80            | 2          |
| 7                | 2  | 2                  |    | 8           | 5            | 1           | 110         | 10            | 2          |
| 5                | 2  | 2                  |    | 8           | 2            | 2           | 0           | 100           | 2          |
| 4                | 1  | 2                  |    | 8           | 2            | 0           | 10          | 15            | 4          |
| 2                | 1  | 1                  |    | 4           | 1            | 1           | 4           | 10            | 2          |
| 5                | 2  | 1                  |    | 4           | 3            | 1           | 20          | 40            | 2          |
| 5.88             |    | 3                  |    | 3.53        | 0.98         |             |             |               |            |
| 2                | 1  | 1                  |    | 4           | 1            | 0           | 2           | 8             | 2          |
| 15               | 5  | 2                  |    | 8           | 11           | 1           | 35          | 100           | 4          |
| 12               | 4  | 1                  |    | 4           | 11           | 1           | 2           | 45            | 2          |
| 5                | 2  | 3                  |    | 12          | 2            | 1           | 4           | 10            | 4          |
| 20               | 7  | 4                  |    | 16          | 13           | 1           | 2           | 240           | 4          |
| 15               |    | 1.6                |    | 13.7        | 0.82         |             |             |               |            |
| 19               | 6  | 3                  |    | 12          | 14           | 1           | 2           | 130           | 6          |
| 10.8             |    | 1.7                |    | 7.82        | 0.47         |             |             |               |            |
| 18               |    | 4.9                |    | 4.8         | 1.2          |             |             |               |            |
| 15               | 5  | 2                  |    | 8           | 13           | 1           | 6           | 15            | 0          |
| 26               | 9  | 6                  |    | 24          | 16           | 1           | 0           | 10            | 2          |
| 13               | 4  | 1                  |    | 4           | 10           | 1           | 2           | 50            | 2          |
| 19               | 6  | 2                  |    | 8           | 16           | 1           | 8           | 10            | 0          |
| 26               | 9  | 2                  |    | 8           | 1            | 3           | 0           | 45            | 2          |
| 3                | 1  | 1                  |    | 4           | 2            | 0           | 0           | 30            | 2          |
| 11               | 4  | 3                  |    | 12          | 9            | 1           | 0           | 20            | 4          |
| 2                | 1  | 1                  |    | 4           | 1            | 1           | 130         | 6             | 2          |

|      |   |     |    |      |      |     |     |   |   |
|------|---|-----|----|------|------|-----|-----|---|---|
| 8.62 |   | 2.3 |    | 4.46 | 1.08 |     |     |   |   |
| 11   | 4 | 2   | 8  | 8    | 1    | 0   | 160 | 2 | 2 |
| 6    | 2 | 2   | 8  | 4    | 1    | 4   | 190 | 2 | 4 |
| 6.43 |   | 1.8 |    | 3.8  | 0.9  |     |     |   |   |
| 21   | 7 | 1   | 4  | 20   | 1    | 30  | 25  | 2 | 4 |
| 23   | 8 | 1   | 4  | 20   | 0    | 0   | 2   | 2 | 0 |
| 23   | 8 | 4   | 16 | 7    | 2    | 120 | 30  | 4 | 4 |
